# Supplementary material for: Race and Ethnicity Misclassification in Hospital Discharge Data and the Impact on Differences in Severe Maternal Morbidity Rates in Florida
Source: MDPI journal article supplement (doi:10.3390/ijerph20095689), 2023-04-30

**Table S1. Classification of race groups in BC records to match the race groups provided in**

**HD records**

| <b>Race in BC</b> | <b>Race in HD</b>                 |
|-------------------|-----------------------------------|
| White             | White                             |
| Black             | Black                             |
| American Indian   | American Indian or Alaskan Native |
| Chinese           | Asian                             |
| Japanese          | Asian                             |
| Vietnamese        | Asian                             |
| Korean            | Asian                             |
| Filipino          | Asian                             |
| Indian            | Asian                             |
| Other Asian       | Asian                             |
| Hawaiian          | Asian Pacific Islander            |
| Guam              | Asian Pacific Islander            |
| Samoan            | Asian Pacific Islander            |
| Pacific Islander  | Asian Pacific Islander            |
| Other             | Other                             |
| Unknown           | Unknown                           |

**Table S2. Comparing documentation of maternal race and ethnicity on birth certificates compared to the maternal delivery hospitalization discharge record, Florida, 2016–2019**

| Variable       | Missing Values <sup>a</sup> | Category     | N       | Sensitivity | Specificity | PPV  | NPV  |
|----------------|-----------------------------|--------------|---------|-------------|-------------|------|------|
| Race-ethnicity | Included                    | NH-White     | 321,677 | 90.7        | 91.6        | 89.6 | 92.5 |
|                |                             | NH-Black     | 163,591 | 91.8        | 98.8        | 95.7 | 97.6 |
|                |                             | Hispanic     | 207,817 | 80.8        | 96.8        | 91.0 | 92.6 |
|                |                             | NH-API       | 23,382  | 57.3        | 99.7        | 85.4 | 98.6 |
|                |                             | NH-AIAN      | 805     | 28.2        | 99.9        | 25.2 | 99.9 |
|                | Excluded                    | NH-White     | 312,437 | 93.3        | 91.6        | 90.0 | 94.4 |
|                |                             | NH-Black     | 159,194 | 94.3        | 98.8        | 96.0 | 98.3 |
|                |                             | Hispanic     | 198,433 | 83.3        | 96.9        | 91.4 | 93.6 |
|                |                             | NH-API       | 21,843  | 61.3        | 99.7        | 85.9 | 98.8 |
|                |                             | NH-AIAN      | 754     | 30.1        | 99.9        | 25.6 | 99.9 |
| Race           | Included                    | White        | 521,665 | 84.8        | 93.6        | 97.1 | 70.8 |
|                |                             | Black        | 169,071 | 93.1        | 98.6        | 95.3 | 97.9 |
|                |                             | API          | 23,842  | 59.1        | 99.6        | 84.3 | 98.6 |
|                |                             | AIAN         | 908     | 28.3        | 99.8        | 17.4 | 99.9 |
|                | Excluded                    | White        | 502,938 | 86.4        | 94.0        | 97.4 | 73.0 |
|                |                             | Black        | 164,099 | 94.1        | 98.6        | 95.5 | 98.2 |
|                |                             | API          | 22,239  | 61.2        | 99.6        | 84.6 | 98.7 |
|                |                             | AIAN         | 849     | 28.5        | 99.8        | 17.1 | 99.9 |
| Ethnicity      | Included                    | Hispanic     | 207,817 | 80.8        | 96.8        | 91.0 | 92.6 |
|                |                             | Non-Hispanic | 516,544 | 94.6        | 83.1        | 93.2 | 86.1 |
|                | Excluded                    | Hispanic     | 198,433 | 83.3        | 96.9        | 91.4 | 93.6 |
|                |                             | Non-Hispanic | 500,467 | 96.9        | 83.3        | 93.6 | 91.4 |

PPV, positive predictive value; NPV, negative predictive value; NH, non-Hispanic; API, Asian or Pacific Islander; AIAN, American Indian or Alaskan Native

<sup>a</sup> When missing values are excluded, disagreement only occurs when different non-missing categories are assigned. When missing values are included, disagreement can occur when one data source is missing, regardless of the category assigned by the other data source.

**Figure S1. Comparing distribution of hospital-level sensitivity (top) and positive predictive value (bottom) measures, by race and ethnicity, between the original 97 hospitals and the subset of 39 hospitals included in analysis of severe maternal morbidity, Florida, 2016–2019**

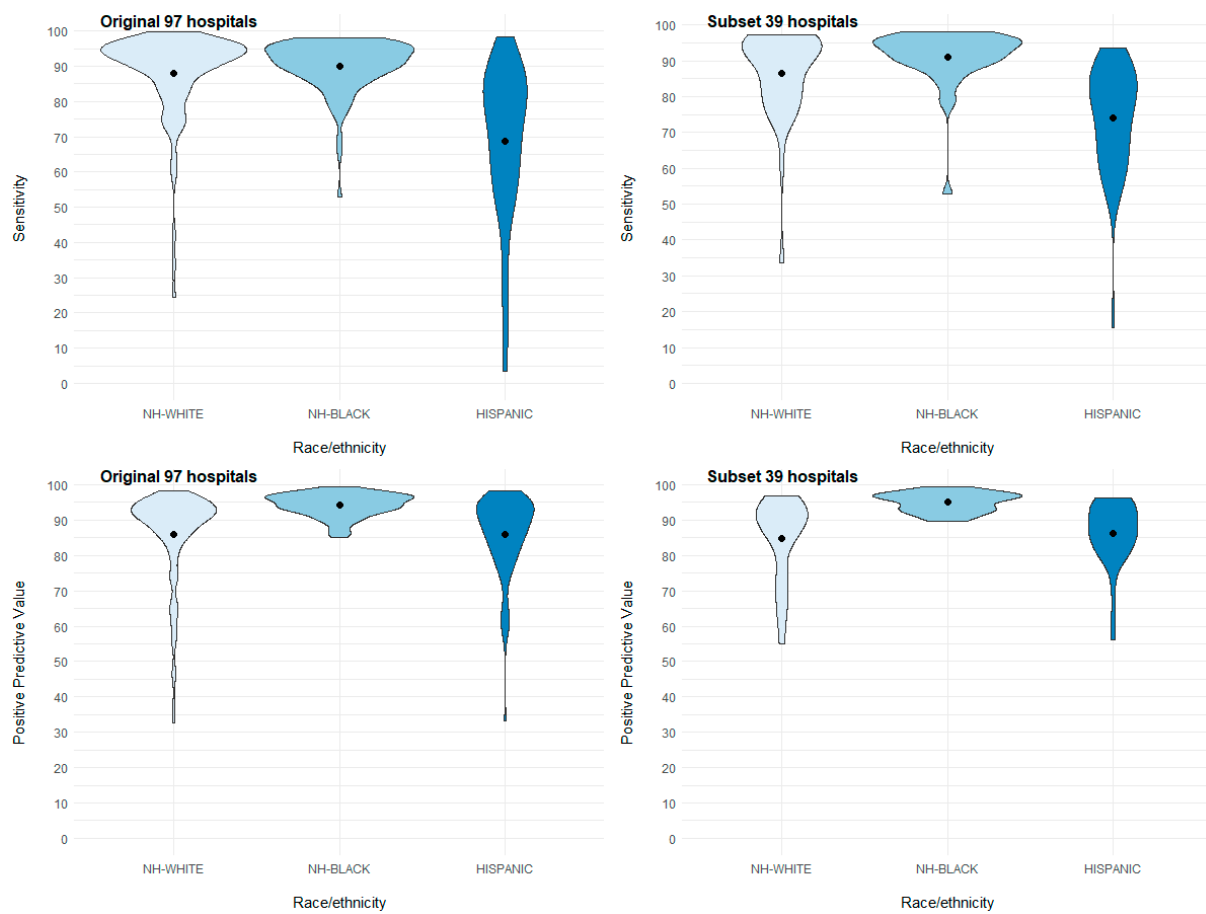

Supplement: s1 [file s1]
